# Supplementary material for: Analysis of Smartphone Recordings in Time, Frequency, and Cepstral Domains to Classify Parkinson’s Disease
Source: PubMed Central journal article supplement — Healthc Inform Res. 2020 Oct 31;26(4):274–83. doi: 10.4258/hir.2020.26.4.274 (PMC7674819; doi:10.4258/hir.2020.26.4.274), 2020-10-31
Supplement: hir-26-4-274-suppl1.pdf [file hir-26-4-274-suppl1.pdf]

**Table S1. Time, frequency, and cepstral domain extracted features using short-term and mid-term processing techniques [15,16]**

| Feature ID | Domain           | Feature name       | Description                                                                                                                                                    |
|------------|------------------|--------------------|----------------------------------------------------------------------------------------------------------------------------------------------------------------|
| 1          | Time domain      | Zero Crossing Rate | The rate in which the sign of the signal changes during the frame.                                                                                             |
| 2          |                  | Energy             | The sum of squares of the signal values normalized by its frame length.                                                                                        |
| 3          |                  | Entropy of Energy  | The measure of abrupt changes in the energy level of the signal.                                                                                               |
| 4          | Frequency domain | Spectral Centroid  | The center of gravity of the spectrum.                                                                                                                         |
| 5          |                  | Spectral Spread    | The second central moment of the spectrum.                                                                                                                     |
| 6          |                  | Spectral Entropy   | Entropy of the normalized spectral energies for a set of subframes.                                                                                            |
| 7          |                  | Spectral Flux      | The squared difference between the normalized magnitudes of the spectra of the two successive frames.                                                          |
| 8          | Cepstral domain  | Spectral Rolloff   | The frequency below which 90% of the magnitude distribution of the spectrum is concentrated.                                                                   |
| 9–21       |                  | MFCCs              | Mel frequency cepstral coefficients (MFCC) form a cepstral representation where the frequency bands are not linear but distributed according to the mel-scale. |
| 22–33      |                  | Chroma Vector      | A 12-element representation of the spectral energy where the bins represent the 12 equal-tempered pitch classes of western-type music.                         |
| 34         | Frequency domain | Chroma Deviation   | The std of the 12 chroma coefficients.                                                                                                                         |

Table S2. Final dataset features

| Feature ID | Feature name        | Description                                                                                                     |
|------------|---------------------|-----------------------------------------------------------------------------------------------------------------|
| 1          | age                 | The age of the participant                                                                                      |
| 2          | gender              | The gender of the participant:<br>1 for males<br>0 for females                                                  |
| 3–36       | features_mean       | The mean of each of the 34 features, example:<br>energy_mean<br>spectral_centroid_mean                          |
| 37–70      | delta_features_mean | The delta of the mean of each of the 34 features, example:<br>delta_energy_mean<br>delta_spectral_centroid_mean |
| 71–104     | features_std        | The std of each of the 34 features, example:<br>energy_std<br>spectral_centroid_std                             |
| 105–138    | delta_features_std  | The delta of the std of each of the 34 features, example:<br>delta_energy_std<br>delta_spectral_centroid_std    |
| 139        | class               | The supervised learning class:<br>1 for PD<br>0 for control                                                     |

PD: Parkinson disease.

Table S3. Selected subset of features using ANOVA and LASSO with various parameter values

| Feature's<br>rank | ANOVA                     | LASSO                       |                             |                             |
|-------------------|---------------------------|-----------------------------|-----------------------------|-----------------------------|
|                   | Best 30 features          | Best 11 features (C = 0.01) | Best 21 features (C = 0.02) | Best 33 features (C = 0.03) |
| 1                 | age                       | gender                      | gender                      | gender                      |
| 2                 | gender                    | age                         | age                         | age                         |
| 3                 | energy_entropy_mean       | energy_entropy_mean         | energy_entropy_mean         | energy_entropy_mean         |
| 4                 | mfcc_9_mean               | spectral_spread_mean        | spectral_spread_mean        | spectral_spread_mean        |
| 5                 | spectral_spread_mean      | mfcc_6_mean                 | mfcc_1_mean                 | mfcc_1_mean                 |
| 6                 | mfcc_8_mean               | mfcc_8_mean                 | mfcc_4_mean                 | mfcc_2_mean                 |
| 7                 | mfcc_10_mean              | mfcc_9_mean                 | mfcc_6_mean                 | mfcc_3_mean                 |
| 8                 | energy_mean               | mfcc_10_mean                | mfcc_8_mean                 | mfcc_4_mean                 |
| 9                 | mfcc_6_mean               | mfcc_12_mean                | mfcc_9_mean                 | mfcc_6_mean                 |
| 10                | spectral_centroid_mean    | chroma_8_mean               | mfcc_10_mean                | mfcc_8_mean                 |
| 11                | energy_entropy_std        | delta_spectral_spread_std   | mfcc_11_mean                | mfcc_9_mean                 |
| 12                | chroma_std_mean           | -                           | mfcc_12_mean                | mfcc_10_mean                |
| 13                | chroma_8_mean             | -                           | chrom_6_mean                | mfcc_11_mean                |
| 14                | delta_mfcc_7_std          | -                           | chroma_8_mean               | mfcc_12_mean                |
| 15                | delta_energy_entropy_std  | -                           | chroma_11_mean              | chroma_5_mean               |
| 16                | delta_mfcc_4_std          | -                           | energy_entropy_std          | chroma_6_mean               |
| 17                | energy_std                | -                           | mfcc_3_mean                 | chroma_8_mean               |
| 18                | delta_mfcc_5_std          | -                           | delta_spectral_spread_std   | chroma_10_mean              |
| 19                | delta_energy_std          | -                           | delta_mfcc_3_std            | chroma_11_mean              |
| 20                | delta_spectral_spread_std | -                           | delta_mfcc_12_std           | energy_entropy_std          |
| 21                | delta_mfcc_6_std          | -                           | delta_chroma_7_std          | mfcc_3_std                  |
| 22                | zcr_mean                  | -                           | -                           | mfcc_8_std                  |
| 23                | mfcc_12_mean              | -                           | -                           | mfcc_13_std                 |
| 24                | spectral_entropy_mean     | -                           | -                           | chroma_8_std                |
| 25                | mfcc_13_mean              | -                           | -                           | delta_spectral_spread_std   |
| 26                | chroma_8_std              | -                           | -                           | delta_mfcc_2_std            |
| 27                | mfcc_2_mean               | -                           | -                           | delta_mfcc_3_std            |
| 28                | mfcc_8_std                | -                           | -                           | delta_mfcc_11_std           |
| 29                | mfcc_6_std                | -                           | -                           | delta_mfcc_12_std           |
| 30                | mfcc_5_std                | -                           | -                           | delta_chroma_3_std          |
| 31                | -                         | -                           | -                           | delta_chroma_7_std          |
| 32                | -                         | -                           | -                           | delta_chroma_9_std          |
| 33                | -                         | -                           | -                           | delta_chroma_12_std         |

ANOVA: analysis of variance, LASSO: least absolute shrinkage and selection operator.
